# Supplementary material for: ICAM-1 controls development and function of ILC2
Source: PubMed Central journal article supplement — J Exp Med. 2018 Jul 26;215(8):2157–74. doi: 10.1084/jem.20172359 (PMC6080904; doi:10.1084/jem.20172359), 2018-07-26
Supplement: JEM_20172359_sm.pdf [file JEM_20172359_sm.pdf]

## Supplemental material

Lei et al., <https://doi.org/10.1084/jem.20172359>

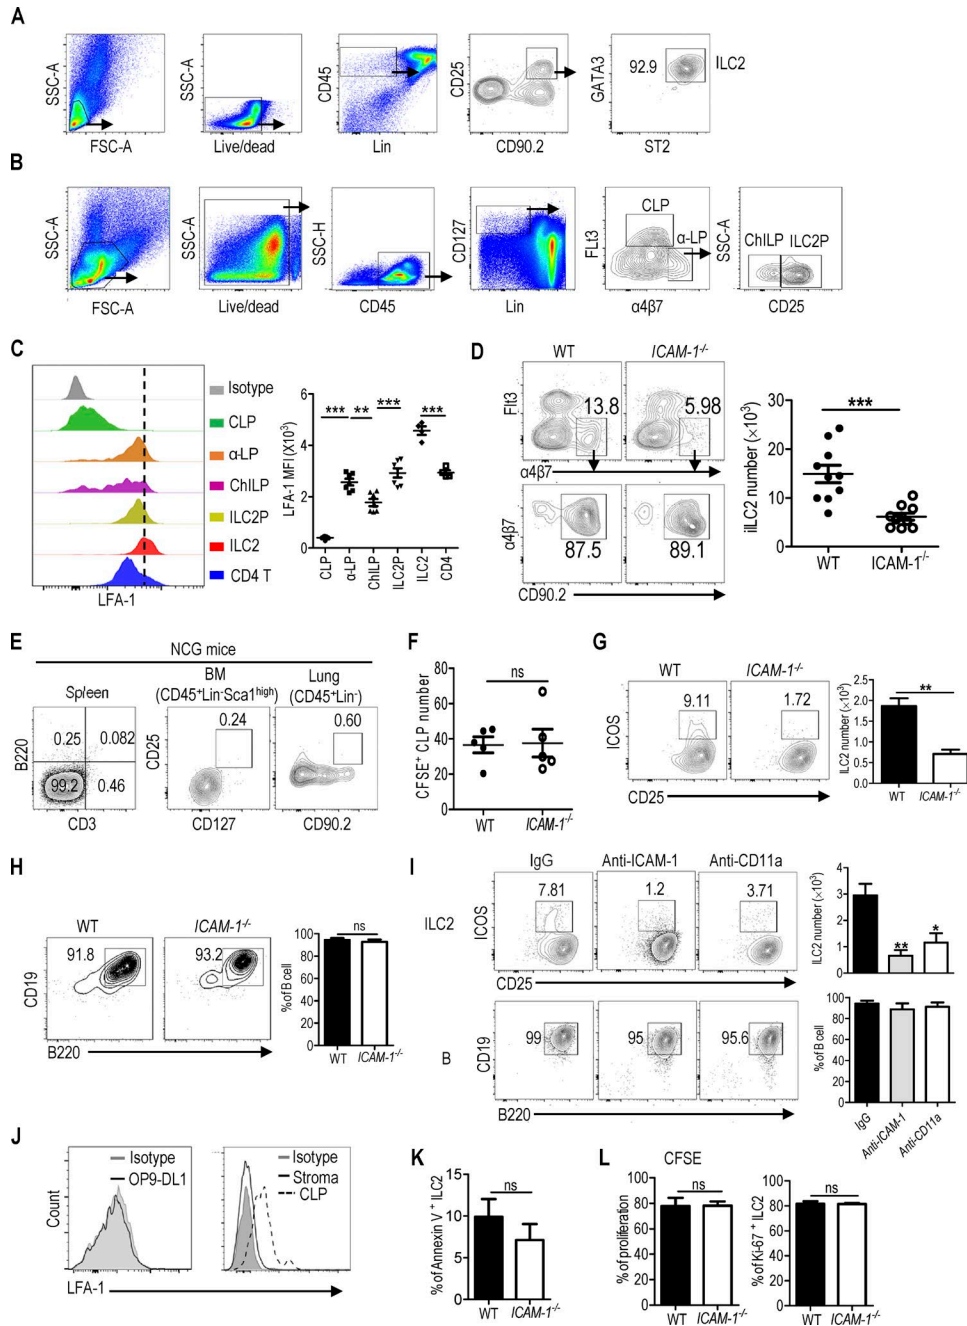

**Figure S1. ICAM-1 is required for the development of ILC2.** (A) Gating strategy of lung ILC2 (CD45<sup>+</sup>Lin<sup>-</sup>CD90.2<sup>+</sup>CD25<sup>+</sup>GATA3<sup>high</sup>ST2<sup>+</sup>). Data are representative results from eight mice. (B) Gating strategy of CLP (CD45<sup>+</sup>Lin<sup>-</sup>CD127<sup>+</sup>Flt3<sup>+</sup>α4β7<sup>-</sup>), α-LP (CD45<sup>+</sup>Lin<sup>-</sup>CD127<sup>+</sup>Flt3<sup>+</sup>α4β7<sup>+</sup>), ChILP (CD45<sup>+</sup>Lin<sup>-</sup>CD127<sup>+</sup>Flt3<sup>-</sup>α4β7<sup>-</sup>CD25<sup>-</sup>), and ILC2P (CD45<sup>+</sup>Lin<sup>-</sup>CD127<sup>+</sup>Flt3<sup>-</sup>α4β7<sup>+</sup>CD25<sup>+</sup>) in the BM of adult mice, pregated on live cells. Data are representative results from six mice. (C) Expression of LFA-1 on CLP, α-LP, ChILP, and ILC2P in BM as well as on ILC2 and CD4<sup>+</sup> T cells in lung from WT mice ( $n = 4-7$ ). Light gray represents the isotype control. (D) Representative flow cytometry plots of BM iILC2s (pregated on CD45<sup>+</sup>Lin<sup>-</sup>CD127<sup>+</sup> cells) and the number of BM iILC2s from WT and *ICAM-1*<sup>-/-</sup> mice ( $n = 10$  mice/group). (E) Representative flow cytometry plots of B220<sup>+</sup> B and CD3<sup>+</sup> T cells in spleen, and BM iILC2 and lung ILC2 from NCG mice. (F) WT recipient mice were lethally irradiated with 9.5 Gy and were reconstituted by intravenous injection of 10 million CFSE<sup>+</sup> BM from WT and *ICAM-1*<sup>-/-</sup> mice, respectively. 18 h later, the number of CFSE<sup>+</sup> CLP was evaluated by flow cytometry ( $n = 5$  mice/group). (G) CLPs from WT and *ICAM-1*<sup>-/-</sup> mice were co-cultured with OP9-DL1 in the presence of IL-7 (10 ng/ml) for 9–10 d, and the frequencies of ILC2 (pregated on CD45<sup>+</sup>Lin<sup>-</sup> cells) as well as ILC2 numbers were shown. (H) Frequencies of B cells (CD19<sup>+</sup>B220<sup>+</sup>) derived from WT and *ICAM-1*<sup>-/-</sup> CLPs after co-culture with OP9 cells for 10 d. (I) The effect of anti-ICAM-1 and anti-CD11a on the ILC2 and B cell differentiation from CLPs was shown. ILC2 differentiation from CLP was performed as in G and B cell differentiation was done as in H. (J) Enumeration of LFA-1 expression on OP9-DL1, BM stroma cells (CD45<sup>+</sup>Lin<sup>-</sup>TER-119<sup>-</sup>), and CLP. Light gray represents the isotype control. (K) Frequencies of Annexin V<sup>+</sup> iILC2s in BM from WT and *ICAM-1*<sup>-/-</sup> mice after culture in the presence of IL-7 (10 ng/ml) and IL-33 (10 ng/ml) for 24 h. (L) Proliferation of iILC2s determined by CFSE staining in BM cultured as in K for 3 d (left). The right showed the frequencies of ki-67<sup>+</sup> BM iILC2s from WT and *ICAM-1*<sup>-/-</sup> mice after 6 d in the presence of IL-2 (10 ng/ml), IL-7 (20 ng/ml), and IL-33 (100 ng/ml). Data are representative of two (A–C, E, F and J) to three (D, G–I, K, and L) independent experiments. Error bars show mean ± SEM; \*,  $P < 0.05$ ; \*\*,  $P < 0.01$ ; \*\*\*,  $P < 0.001$  by unpaired Student's *t* test. Numbers within flow plots indicate the percentages of cells gated.

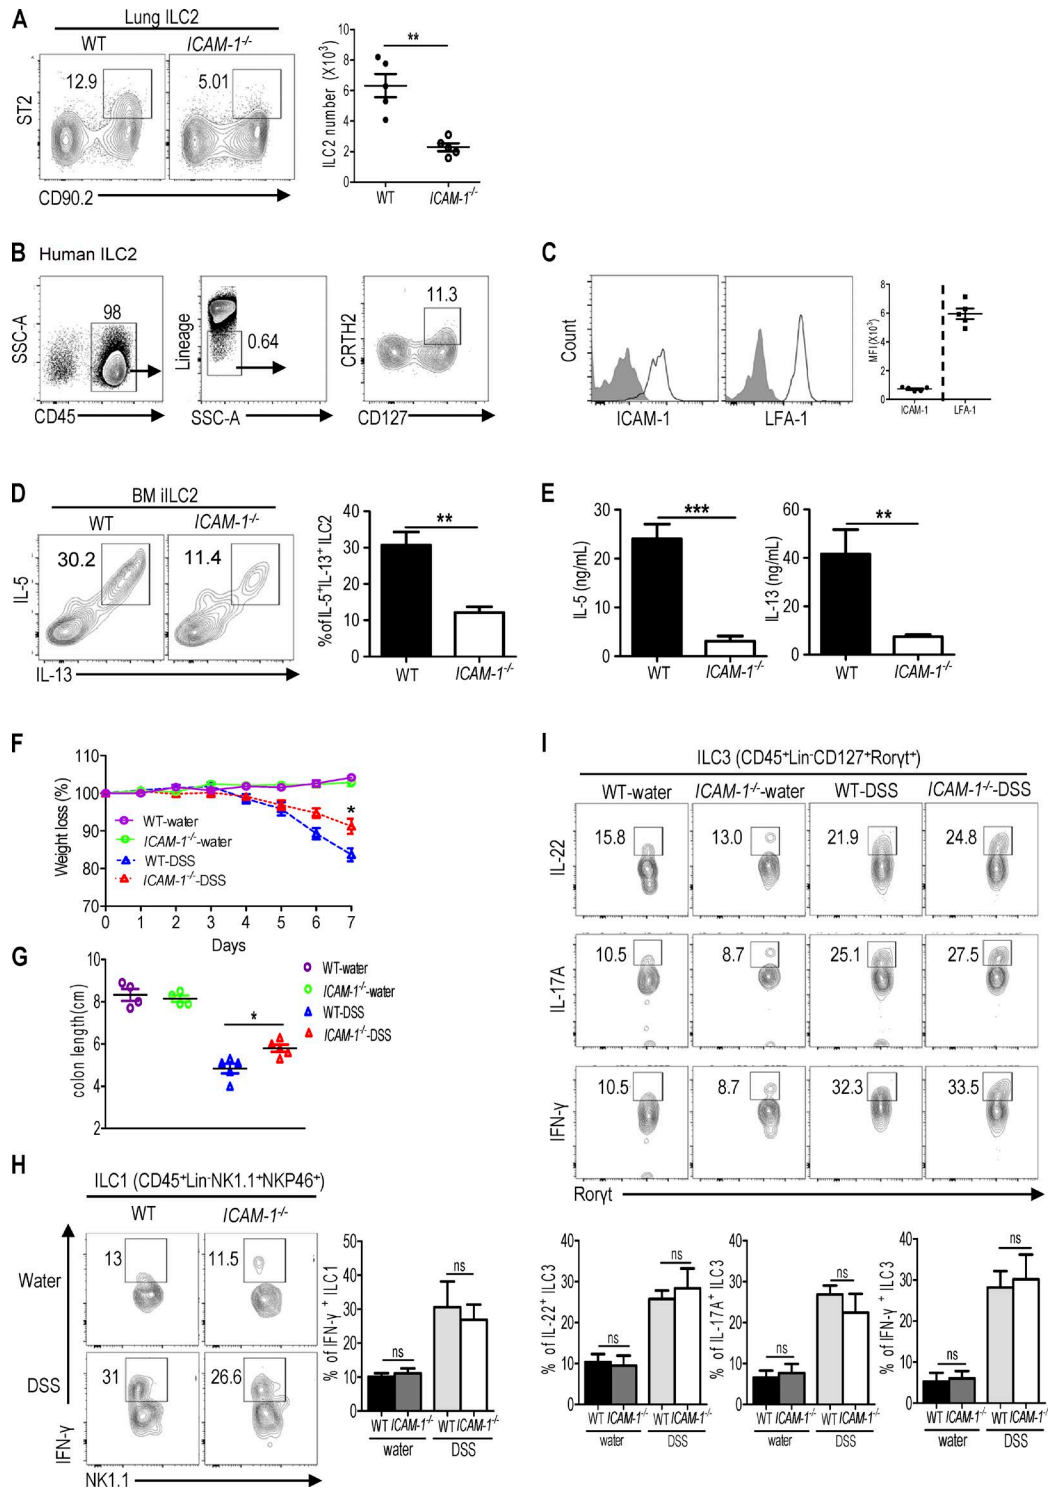

**Figure S2. ICAM-1 regulates the function of ILC2, but not ILC1 and ILC3. (A)** Flow cytometric analysis of lung ILC2 (pregated on CD45<sup>+</sup>Lin<sup>-</sup> cells) from WT and *ICAM-1*<sup>-/-</sup> mice (*n* = 5 mice/group). **(B)** Representative flow cytometric analysis of human ILC2 (CD45<sup>+</sup>Lin<sup>-</sup>CD127<sup>+</sup>CRTH2<sup>+</sup>) from three independent experiments. **(C)** Flow cytometric analysis of ICAM-1 and LFA-1 expression on human ILC2s. Mean ± SEM from three independent experiments was shown on the right. MFI, mean fluorescence intensity. **(D)** Equal number of iILC2s (5,000 cells) from BM of WT and *ICAM-1*<sup>-/-</sup> mice were cultured for 6 d in the presence of IL-2 (10 ng/ml), IL-7 (20 ng/ml), and IL-33 (100 ng/ml). Frequencies of IL-5<sup>+</sup>IL-13<sup>+</sup> ILC2s were evaluated by flow cytometry. Both representative results and mean ± SEM from three independent experiments were shown. **(E)** The amount of IL-5 and IL-13 in the culture supernatants of D was determined by ELISA. **(F–I)** WT and *ICAM-1*<sup>-/-</sup> mice were given normal water (*n* = 4 mice/group) or 2.5% DSS in drinking water (*n* = 5 mice/group) for 7 d. Body weight loss (F) and colon length (G) were shown. **(H)** Flow cytometric plots of the frequencies of IFN-γ<sup>+</sup> in ILC1s from colon; both representative results and mean ± SEM were shown. **(I)** Flow cytometric analysis of IL-22<sup>+</sup>, IL-17A<sup>+</sup>, and IFN-γ<sup>+</sup> cells in total ILC3s (CD45<sup>+</sup>Lin<sup>-</sup>CD127<sup>+</sup>Roryt<sup>+</sup>) from colon. Data are representative of two (A and F–I) to three (B–E) independent experiments. Error bars show the mean ± SEM \*, *P* < 0.05; \*\*, *P* < 0.01; \*\*\*, *P* < 0.001 by unpaired Student's *t* test. ns, not significant. Numbers within flow plots indicate the percentages of cells gated.

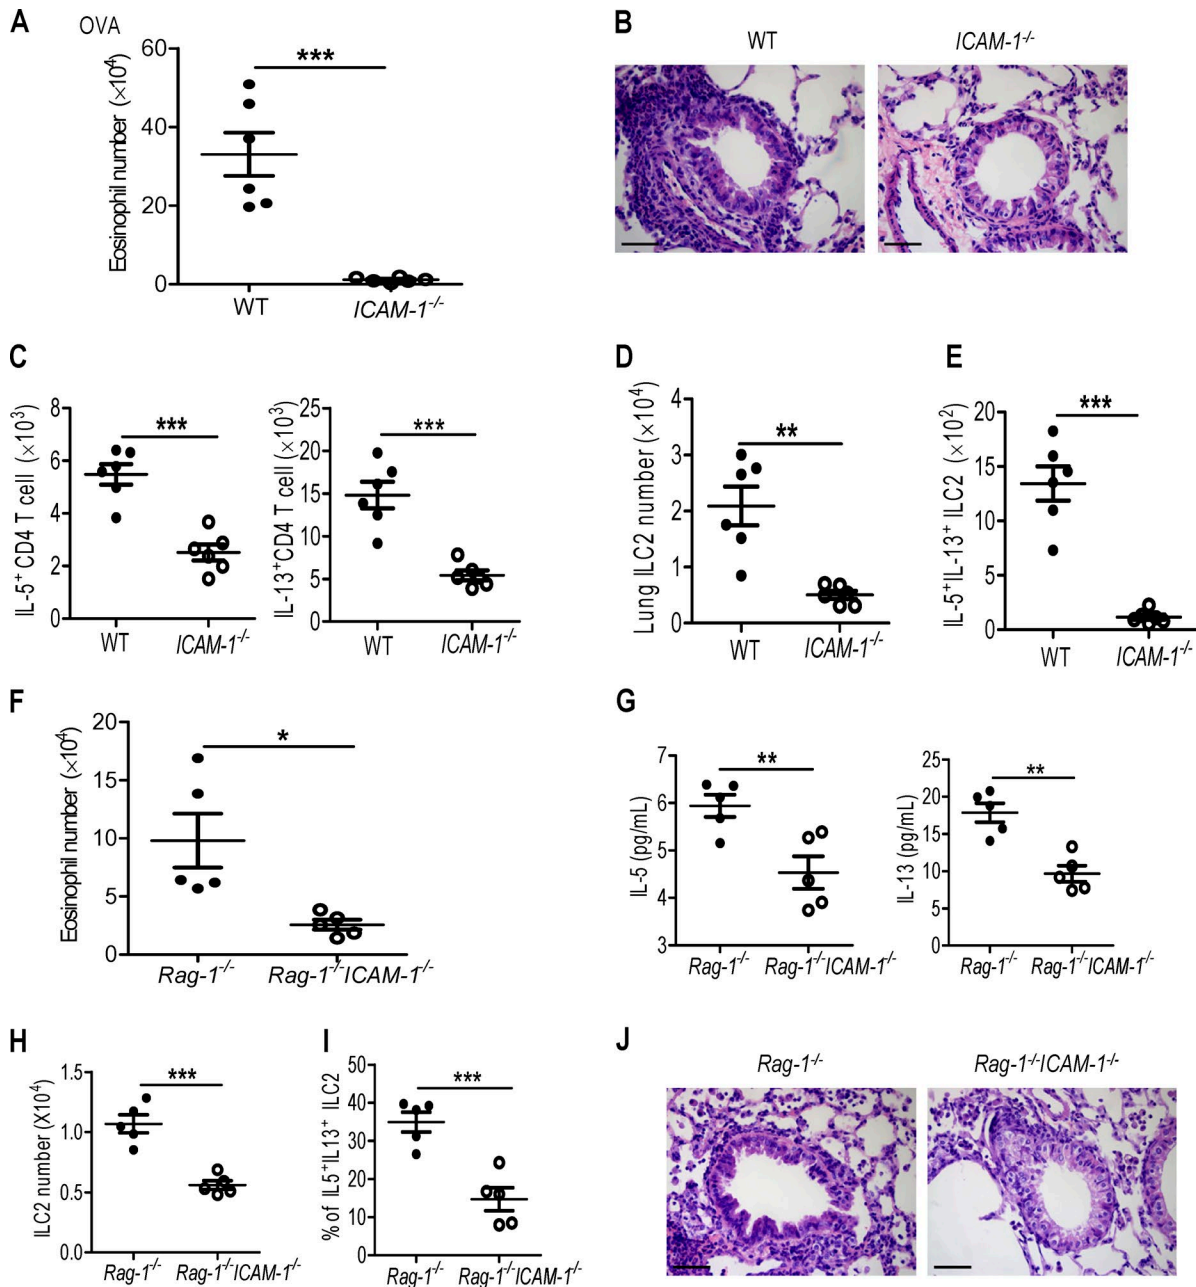

Figure S3. **Effect of ICAM-1 on ILC2-induced lung inflammation is independent of Th2 response.** (A–D) WT and *ICAM-1*<sup>-/-</sup> mice were sensitized with 100  $\mu$ g OVA + Alum on day 0 and day 7 ( $n = 6$  per group). On day 14, mice were intranasally challenged with 100  $\mu$ g OVA for three consecutive days. Mice were sacrificed 24 h after the last challenge. (A) The number of eosinophils from BAL in WT and *ICAM-1*<sup>-/-</sup> mice is shown. (B) Representative H&E staining of lung sections (bars, 100  $\mu$ m). (C) The number of IL-5<sup>+</sup> CD4 T and IL-13<sup>+</sup> CD4 T cells in lung is shown. (D) The number of ILC2 in lungs from WT and *ICAM-1*<sup>-/-</sup> mice after OVA treatment. (E) The number of IL-5<sup>+</sup>IL-13<sup>+</sup> ILC2s in lungs from WT and *ICAM-1*<sup>-/-</sup> mice. (F–J) *Rag-1*<sup>-/-</sup> and *Rag-1*<sup>-/-</sup>*ICAM-1*<sup>-/-</sup> mice were intranasally challenged with papain for five consecutive days. Mice were sacrificed 24 h after the last challenge ( $n = 5$  per group). (F) The number of eosinophils from lung BAL was shown. (G) The amount of IL-5 and IL-13 in BAL was determined by ELISA. (H) Lung ILC2 numbers. (I) Frequencies of IL-5<sup>+</sup>IL-13<sup>+</sup> in lung ILC2s after cell stimulation cocktail treatment for 4 h. (J) Representative H&E staining of lung sections. Bars, 100  $\mu$ m. Data are representative of two independent experiments. Error bars show the mean  $\pm$  SEM; \*,  $P < 0.05$ ; \*\*,  $P < 0.01$ ; \*\*\*,  $P < 0.001$  by unpaired Student's  $t$  test.

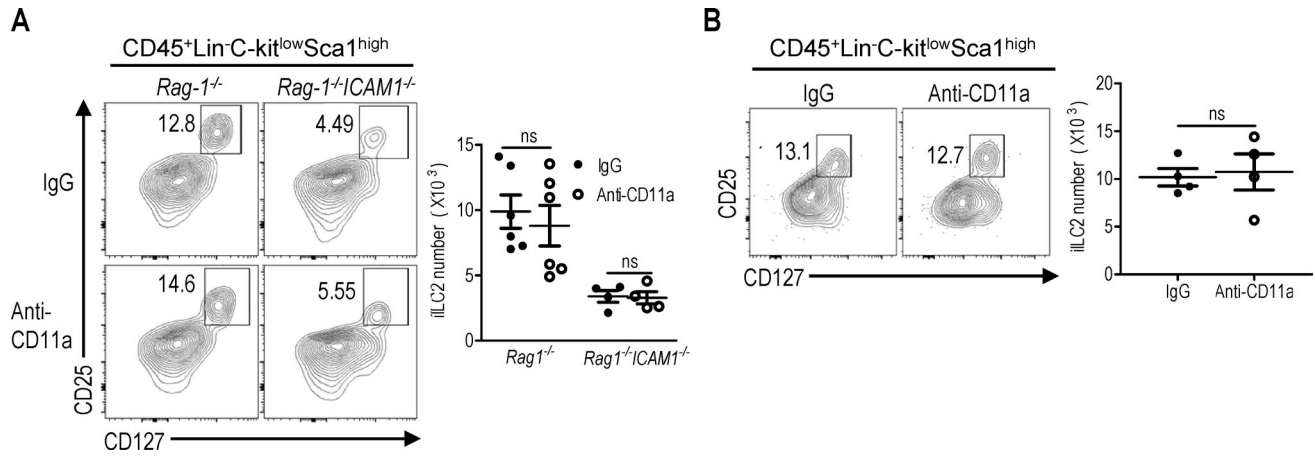

Figure S4. **Anti-CD11a does not influence the level of BM iILC2s.** (A) *Rag1*<sup>-/-</sup> ( $n = 6$  per group) and *Rag1*<sup>-/-</sup>*ICAM1*<sup>-/-</sup> ( $n = 4$  per group) mice were injected intraperitoneally with anti-mouse CD11a (100  $\mu\text{g}/\text{mouse}$ ) or IgG (100  $\mu\text{g}/\text{mouse}$ ) control on day 0, followed by intranasally challenged with IL-33 (500 ng/mouse/d) for three consecutive days. Mice were sacrificed on day 4. Flow cytometric analysis of BM iILC2 (pregated on CD45<sup>+</sup>Lin<sup>-</sup>C-kit<sup>low</sup>Sca1<sup>high</sup> cells). Both representative data and mean  $\pm$  SEM were included. (B) *Rag1*<sup>-/-</sup> mice ( $n = 4$  per group) were injected intraperitoneally with anti-mouse CD11a (100  $\mu\text{g}/\text{mouse}$ ) or IgG (100  $\mu\text{g}/\text{mouse}$ ) control, the levels of BM iILC2 were analyzed 3 d later. Data are representative of two independent experiments. Error bars indicate the mean  $\pm$  SEM. Comparison between groups was calculated by unpaired Student's *t* test. ns, not significant. Numbers within flow plots indicate the percentages of cells gated.

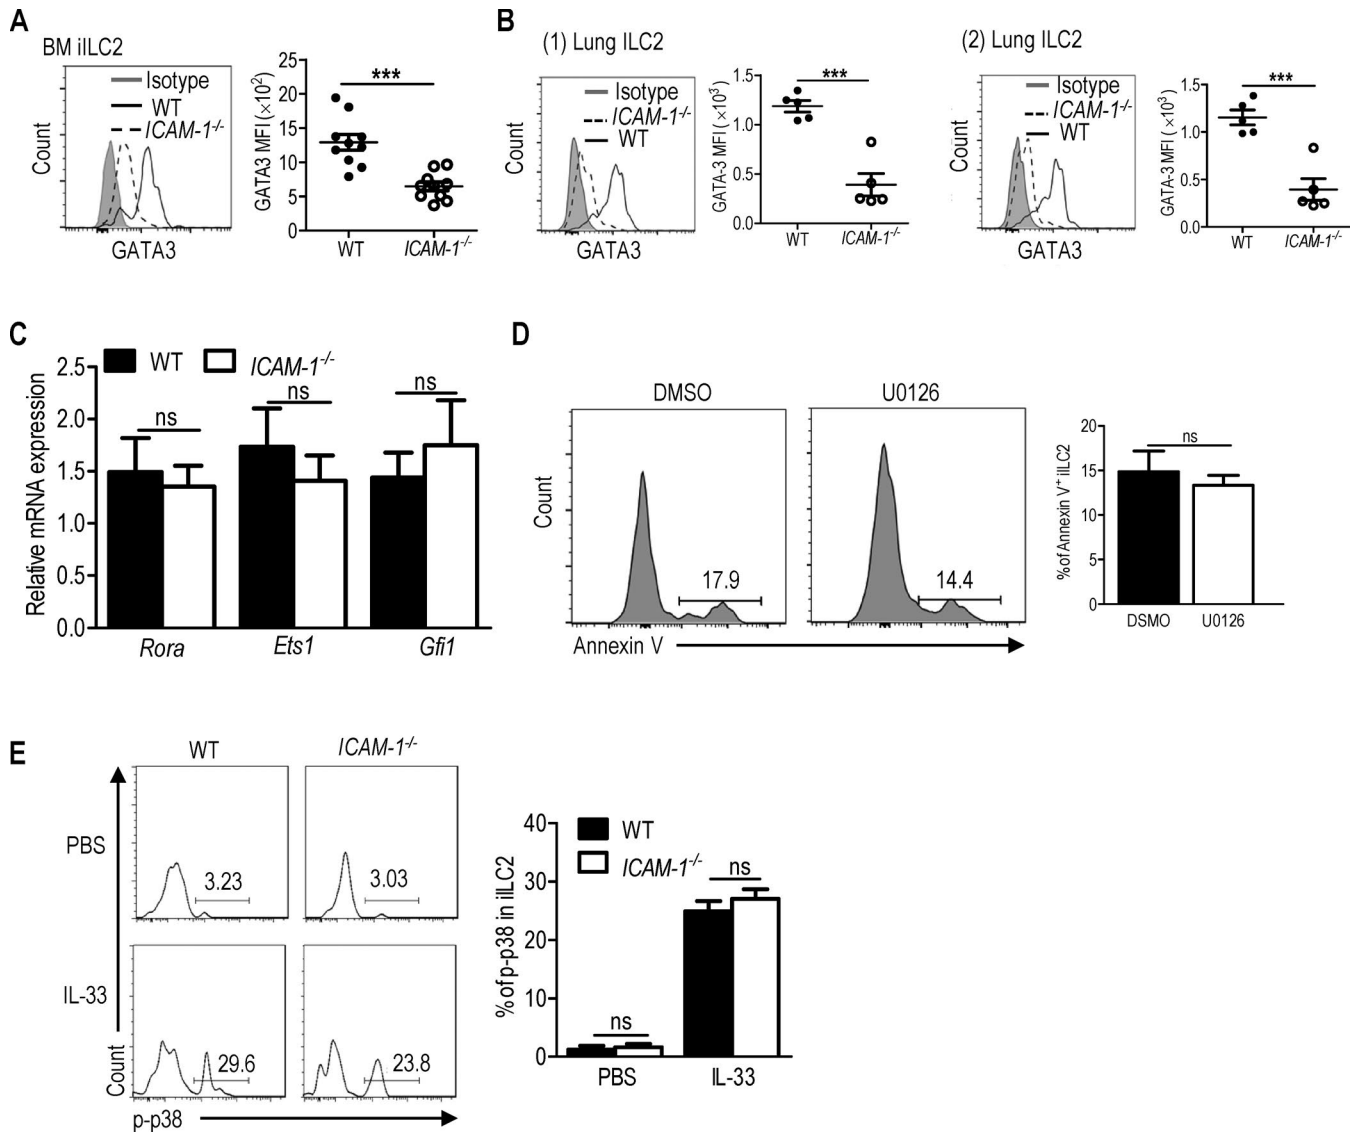

Figure S5. **ICAM-1 regulates the expression of GATA3 protein.** (A) A histogram showing the expression of GATA3 and its MFI levels in BM iILC2s (CD45<sup>+</sup>Lin<sup>-</sup>CD127<sup>-</sup>Flt3<sup>-</sup>α4β7<sup>+</sup>CD90.2<sup>+</sup>) from WT (solid line) and ICAM-1<sup>-/-</sup> (dashed line) mice ( $n = 10$ /group). (B) Enumeration of GATA3 expression and its MFI levels in lung ILC2 defined as two strategies: (1) CD45<sup>+</sup>Lin<sup>-</sup>CD90.2<sup>+</sup>CD25<sup>+</sup>, and (2) CD45<sup>+</sup>Lin<sup>-</sup>CD90.2<sup>+</sup>ST2<sup>+</sup>. ( $n = 5$  mice/group). (C) The expression of *Rora*, *Ets1*, and *Gfi1* in BM iILC2s from WT and ICAM-1<sup>-/-</sup> mice was analyzed by qRT-PCR. (D) BM from WT BM cells were cultured with DMSO or U0126 (20 μM) in the presence of IL-7 (10 ng/ml) and IL-33 (10 ng/ml) for 24 h. Percentages of Annexin V<sup>+</sup> iILC2s were shown. (E) Frequencies of p-p38 in BM iILC2s treated with PBS or IL-33 (50 ng/ml) for 30 min. Data are representative of two (B) to three (A and C-E) independent experiments. Error bars show mean ± SEM; \*\*\*,  $P < 0.001$  by unpaired Student's *t* test. ns, not significant. Numbers within flow plots indicate the percentages of cells gated.

Table S1 shows the antibodies used in this study. Table S2 shows primer sequences used for qRT-PCR. They are included as separate Excel files.
